# Supplementary material
Source: ML conference proceedings conference paper supplement (https://openreview.net/forum?id=_SJ-_yyes8)
Supplement: supplementary_material [file attachment]

## APPENDIX

## A ALGORITHM

**Algorithm 1** DrQ-v2: Improved data-augmented RL.**Inputs:** $f_\xi, \pi_\phi, Q_{\theta_1}, Q_{\theta_2}$ : parametric networks for encoder, policy, and Q-functions respectively.

aug: random shifts image augmentation.

 $\sigma(t)$ : scheduled standard deviation for the exploration noise defined in Equation (3). $T, B, \alpha, \tau, c$ : training steps, mini-batch size, learning rate, target update rate, clip value.**Training routine:****for** each timestep  $t = 1..T$  **do** $\sigma_t \leftarrow \sigma(t)$ 

▷ Compute stddev for the exploration noise

 $\mathbf{a}_t \leftarrow \pi_\phi(f_\xi(\mathbf{x}_t)) + \epsilon$  and  $\epsilon \sim \mathcal{N}(0, \sigma_t^2)$ 

▷ Add noise to the deterministic action

 $\mathbf{x}_{t+1} \sim P(\cdot | \mathbf{x}_t, \mathbf{a}_t)$ 

▷ Run transition function for one step

 $\mathcal{D} \leftarrow \mathcal{D} \cup (\mathbf{x}_t, \mathbf{a}_t, R(\mathbf{x}_t, \mathbf{a}_t), \mathbf{x}_{t+1})$ 

▷ Add a transition to the replay buffer

UPDATECRITIC( $\mathcal{D}, \sigma_t$ )UPDATEACTOR( $\mathcal{D}, \sigma_t$ )**end for****procedure** UPDATECRITIC( $\mathcal{D}, \sigma$ ) $\{(\mathbf{x}_t, \mathbf{a}_t, r_{t:t+n-1}, \mathbf{x}_{t+n})\} \sim \mathcal{D}$ ▷ Sample a mini batch of  $B$  transitions $\mathbf{h}_t, \mathbf{h}_{t+n} \leftarrow f_\xi(\text{aug}(\mathbf{x}_t)), f_\xi(\text{aug}(\mathbf{x}_{t+n}))$ 

▷ Apply data augmentation and encode

 $\mathbf{a}_{t+n} \leftarrow \pi_\phi(\mathbf{h}_{t+n}) + \epsilon$  and  $\epsilon \sim \text{clip}(\mathcal{N}(0, \sigma^2))$ 

▷ Sample action

Compute  $\mathcal{L}_{\theta_1, \xi}$  and  $\mathcal{L}_{\theta_2, \xi}$  using Equation (1)

▷ Compute critic losses

 $\xi \leftarrow \xi - \alpha \nabla_\xi (\mathcal{L}_{\theta_1, \xi} + \mathcal{L}_{\theta_2, \xi})$ 

▷ Update encoder weights

 $\theta_k \leftarrow \theta_k - \alpha \nabla_{\theta_k} \mathcal{L}_{\theta_k, \xi} \quad \forall k \in \{1, 2\}$ 

▷ Update critic weights

 $\bar{\theta}_k \leftarrow (1 - \tau)\bar{\theta}_k + \tau\theta_k \quad \forall k \in \{1, 2\}$ 

▷ Update critic target weights

**end procedure****procedure** UPDATEACTOR( $\mathcal{D}, \sigma$ ) $\{(\mathbf{x}_t)\} \sim \mathcal{D}$ ▷ Sample a mini batch of  $B$  observations $\mathbf{h}_t \leftarrow f_\xi(\text{aug}(\mathbf{x}_t))$ 

▷ Apply data augmentation and encode

 $\mathbf{a}_t \leftarrow \pi_\phi(\mathbf{h}_t) + \epsilon$  and  $\epsilon \sim \text{clip}(\mathcal{N}(0, \sigma^2))$ 

▷ Sample action

Compute  $\mathcal{L}_\phi$  using Equation (2)

▷ Compute actor loss

 $\phi \leftarrow \phi - \alpha \nabla_\phi \mathcal{L}_\phi$ 

▷ Update actor's weights only

**end procedure**

## B BENCHMARKS

We classify a set of 24 continuous control tasks from DMC (Tassa et al., 2018) into *easy*, *medium*, and *hard* benchmarks and provide a summary for each task in Table 1.

| Task                    | Traits               | Difficulty | Allowed Steps    | $\dim(\mathcal{S})$ | $\dim(\mathcal{A})$ |
|-------------------------|----------------------|------------|------------------|---------------------|---------------------|
| Cartpole Balance        | balance, dense       | easy       | $1 \times 10^6$  | 4                   | 1                   |
| Cartpole Balance Sparse | balance, sparse      | easy       | $1 \times 10^6$  | 4                   | 1                   |
| Cartpole Swingup        | swing                | dense      | $1 \times 10^6$  | 4                   | 1                   |
| Cup Catch               | swing, catch, sparse | easy       | $1 \times 10^6$  | 8                   | 2                   |
| Finger Spin             | rotate, dense        | easy       | $1 \times 10^6$  | 6                   | 2                   |
| Hopper Stand            | stand, dense         | easy       | $1 \times 10^6$  | 14                  | 4                   |
| Pendulum Swingup        | swing, sparse        | easy       | $1 \times 10^6$  | 2                   | 1                   |
| Walker Stand            | stand, dense         | easy       | $1 \times 10^6$  | 18                  | 6                   |
| Walker Walk             | walk, dense          | easy       | $1 \times 10^6$  | 18                  | 6                   |
| Acrobot Swingup         | diff. balance, dense | medium     | $3 \times 10^6$  | 4                   | 1                   |
| Cartpole Swingup Sparse | swing, sparse        | medium     | $3 \times 10^6$  | 4                   | 1                   |
| Cheetah Run             | run, dense           | medium     | $3 \times 10^6$  | 18                  | 6                   |
| Finger Turn Easy        | turn, sparse         | medium     | $3 \times 10^6$  | 6                   | 2                   |
| Finger Turn Hard        | turn, sparse         | medium     | $3 \times 10^6$  | 6                   | 2                   |
| Hopper Hop              | move, dense          | medium     | $3 \times 10^6$  | 14                  | 4                   |
| Quadruped Run           | run, dense           | medium     | $3 \times 10^6$  | 56                  | 12                  |
| Quadruped Walk          | walk, dense          | medium     | $3 \times 10^6$  | 56                  | 12                  |
| Reach Duplo             | manipulation, sparse | medium     | $3 \times 10^6$  | 55                  | 9                   |
| Reacher Easy            | reach, dense         | medium     | $3 \times 10^6$  | 4                   | 2                   |
| Reacher Hard            | reach, dense         | medium     | $3 \times 10^6$  | 4                   | 2                   |
| Walker Run              | run, dense           | medium     | $3 \times 10^6$  | 18                  | 6                   |
| Humanoid Stand          | stand, dense         | hard       | $30 \times 10^6$ | 54                  | 21                  |
| Humanoid Walk           | walk, dense          | hard       | $30 \times 10^6$ | 54                  | 21                  |
| Humanoid Run            | run, dense           | hard       | $30 \times 10^6$ | 54                  | 21                  |

Table 1: A detailed description of each tasks in our *easy*, *medium*, and *hard* benchmarks.

## C FULL COMPARISON TO MODEL-FREE METHODS

### C.1 FULL RESULTS ON EASY BENCHMARK

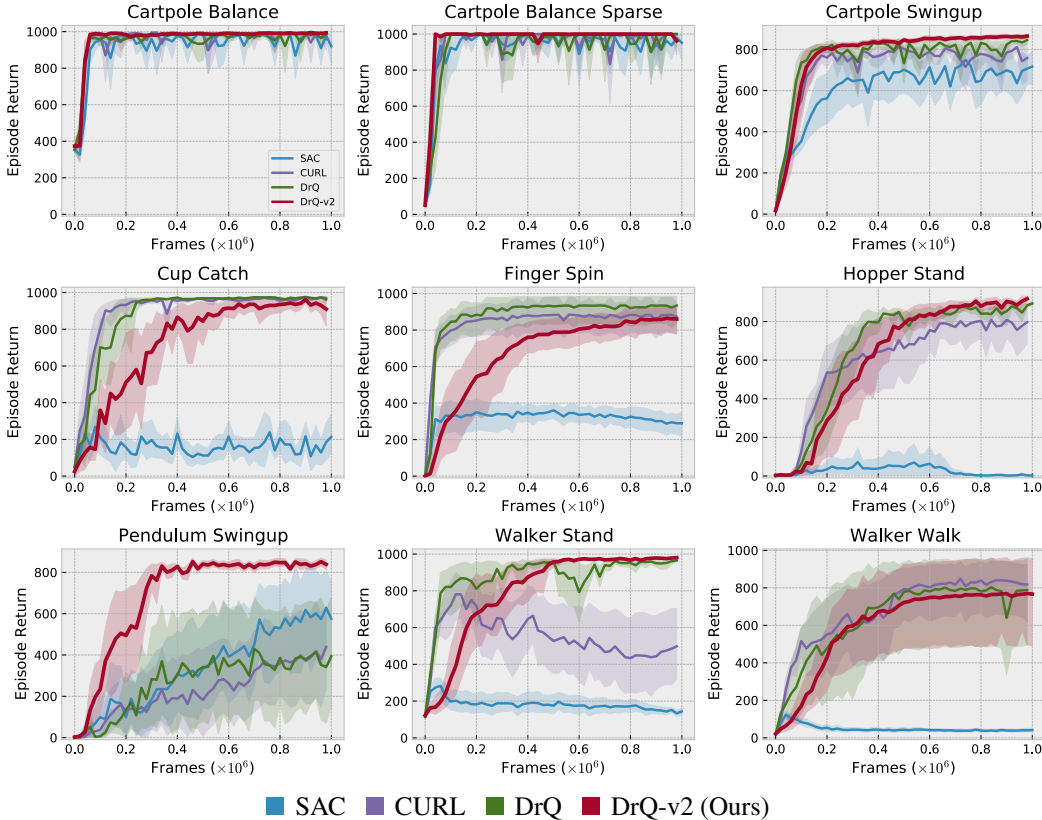

Figure 6: The *easy* benchmark consists of 9 tasks, where performance gains have been largely saturated by prior work. Still, DrQ-v2 is able to match sample complexity of the baselines. We note, that evaluation on these tasks is done for completeness reasons only, and encourage RL practitioners to refrain from using them for benchmarking purposes in future research.

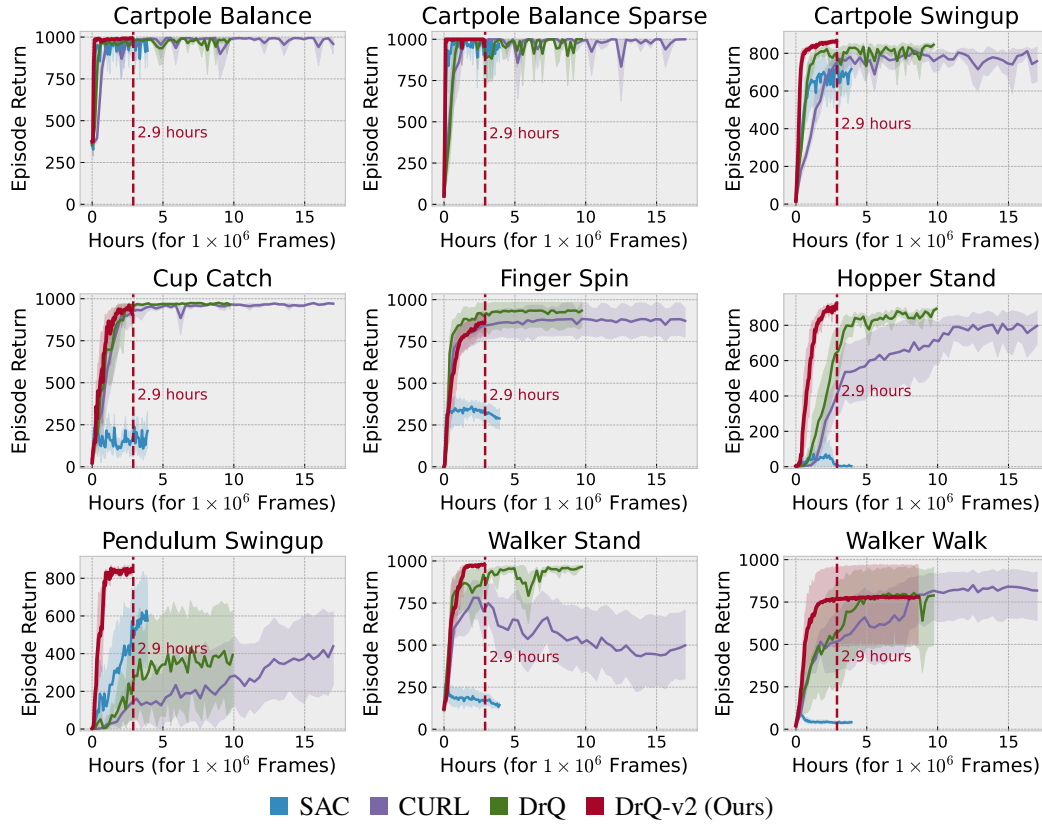

Figure 7: DrQ-v2 requires less than 3 hours to solve tasks from the *easy* benchmark, reaching a throughput of 96 FPS on a single NVIDIA V100 GPU.

## C.2 FULL RESULTS ON MEDIUM BENCHMARK

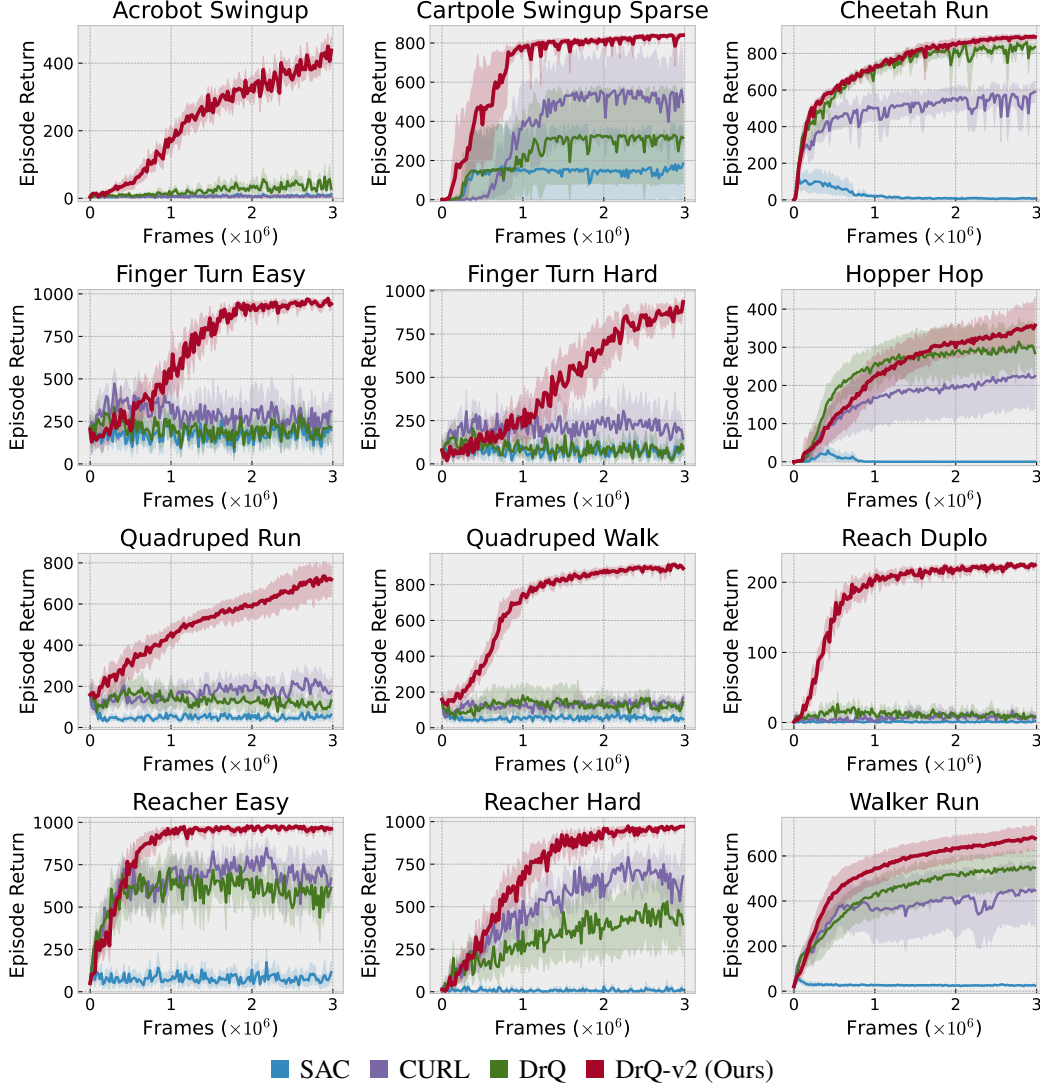

Figure 8: The *medium* benchmark consists of 12 complex control tasks that offer various challenges, including complex dynamics, sparse rewards, hard exploration, and more. DrQ-v2 demonstrates favorable sample efficiency and comfortably outperforms leading model-free baselines.

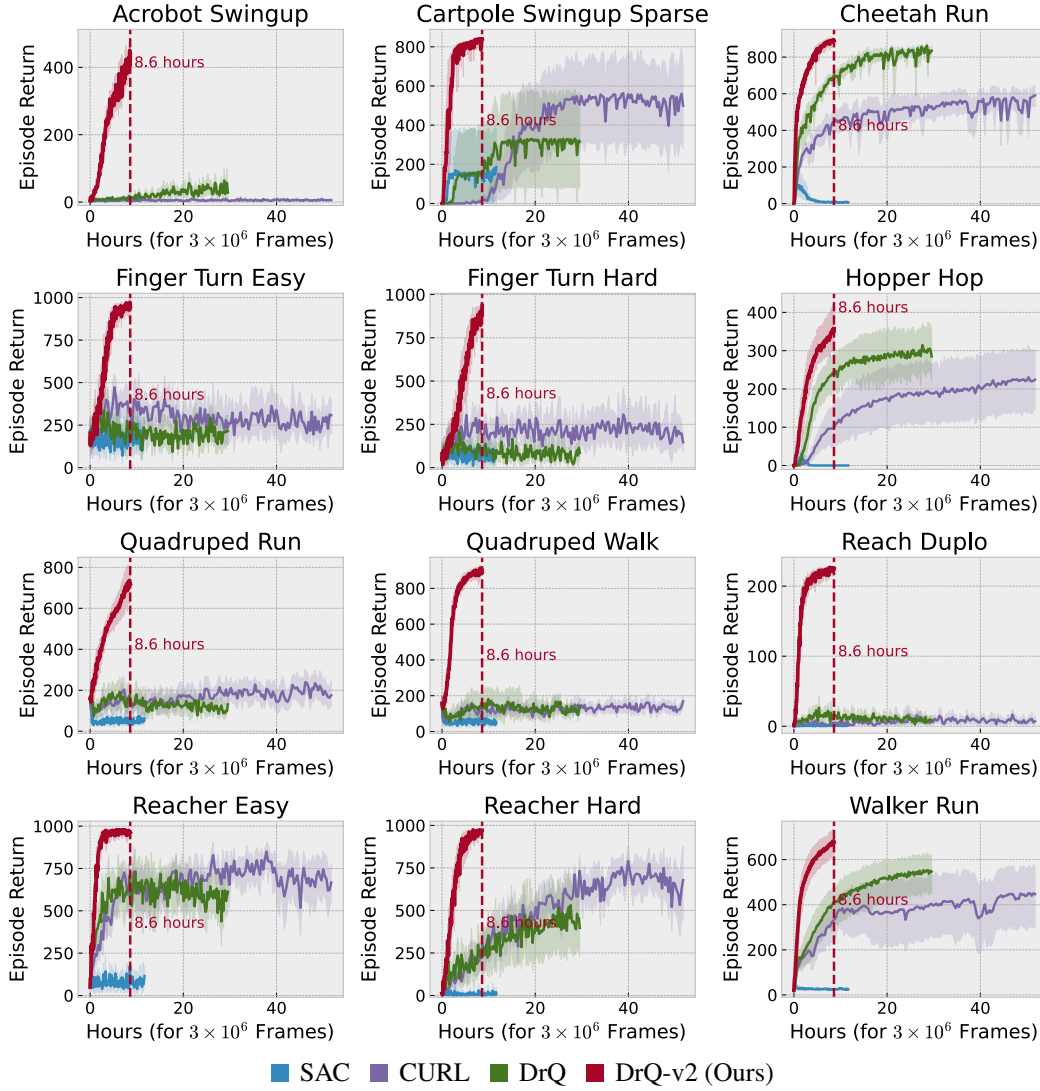

Figure 9: DrQ-v2 requires less than 9 hours to solve tasks from the *medium* benchmark, reaching a throughput of 96 FPS on a single NVIDIA V100 GPU.

## C.3 FULL RESULTS ON HARD BENCHMARK

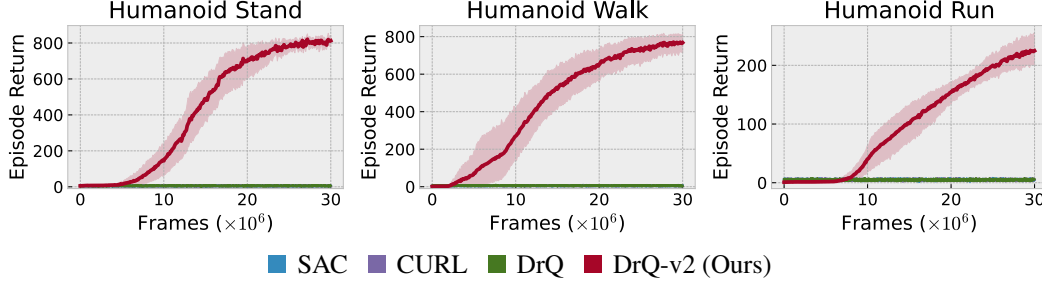

Figure 10: The *hard* benchmark consists of three humanoid locomotion tasks: *stand*, *walk*, and *run*. These three represent particularly hard exploration challenges, being previously unsolvable by model-free methods. The training speed of DrQ-v2 was key to solving the task, since it allowed for extensive investigation of different variations, resulting in the discovery of effective strategies.

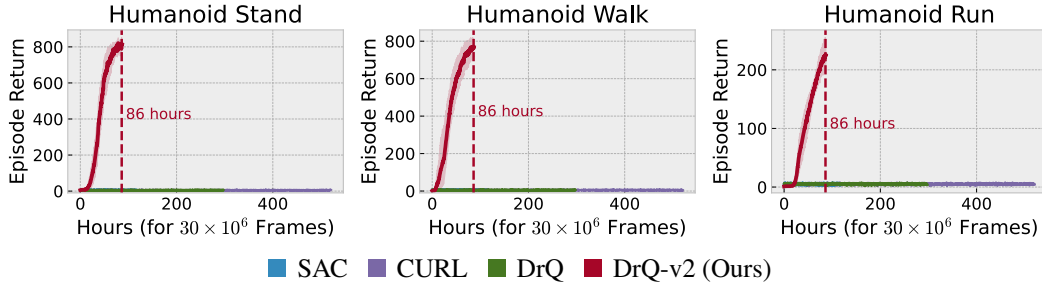

Figure 11: DrQ-v2 requires around 86 hours to solve tasks from the *hard* benchmark, reaching a throughput of 96 FPS on a single NVIDIA V100 GPU.

## D FULL COMPARISON TO MODEL-BASED METHODS

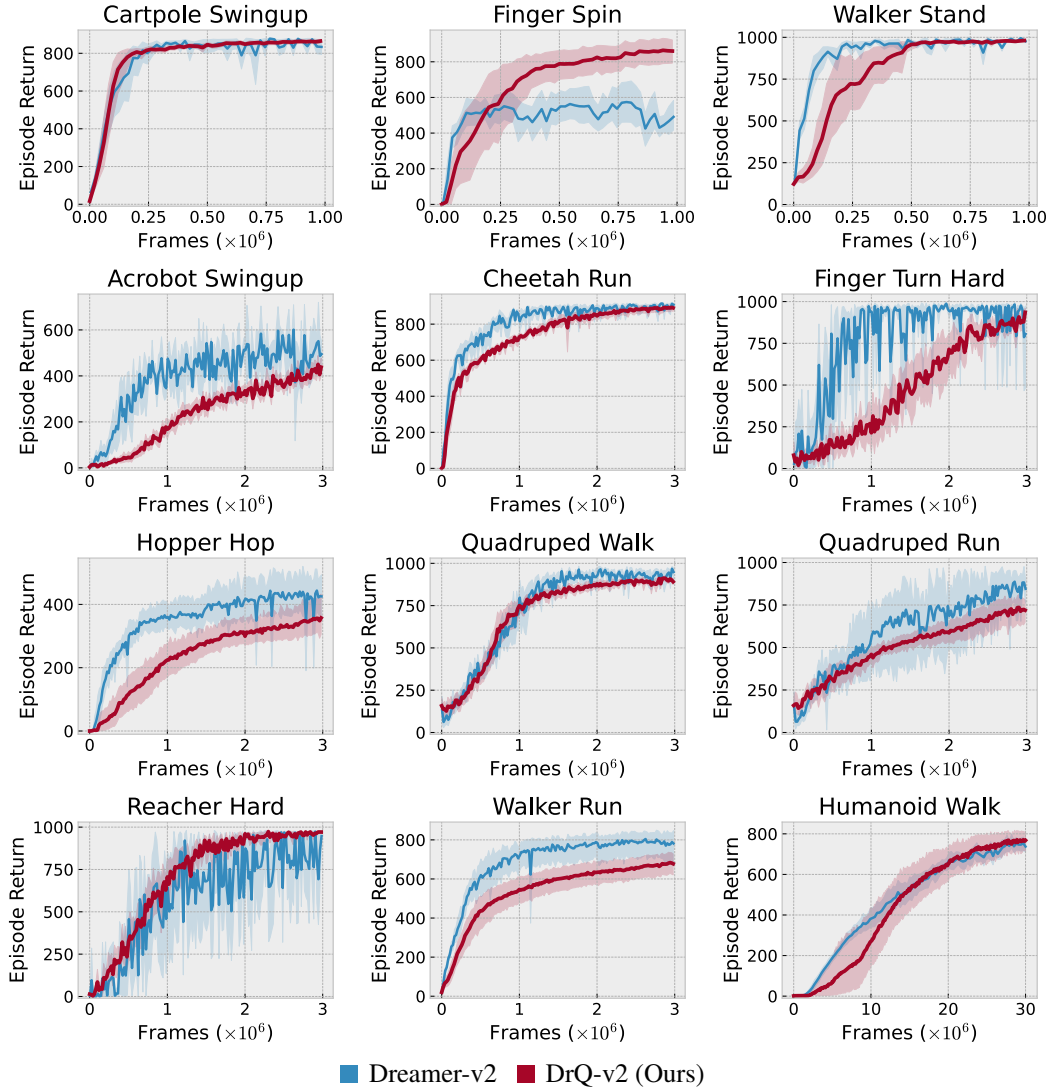

Figure 12: In many cases model-free DrQ-v2 can rival model-based Dreamer-v2 in sample efficiency. There are several tasks, however, where Dreamer-v2 performs better.



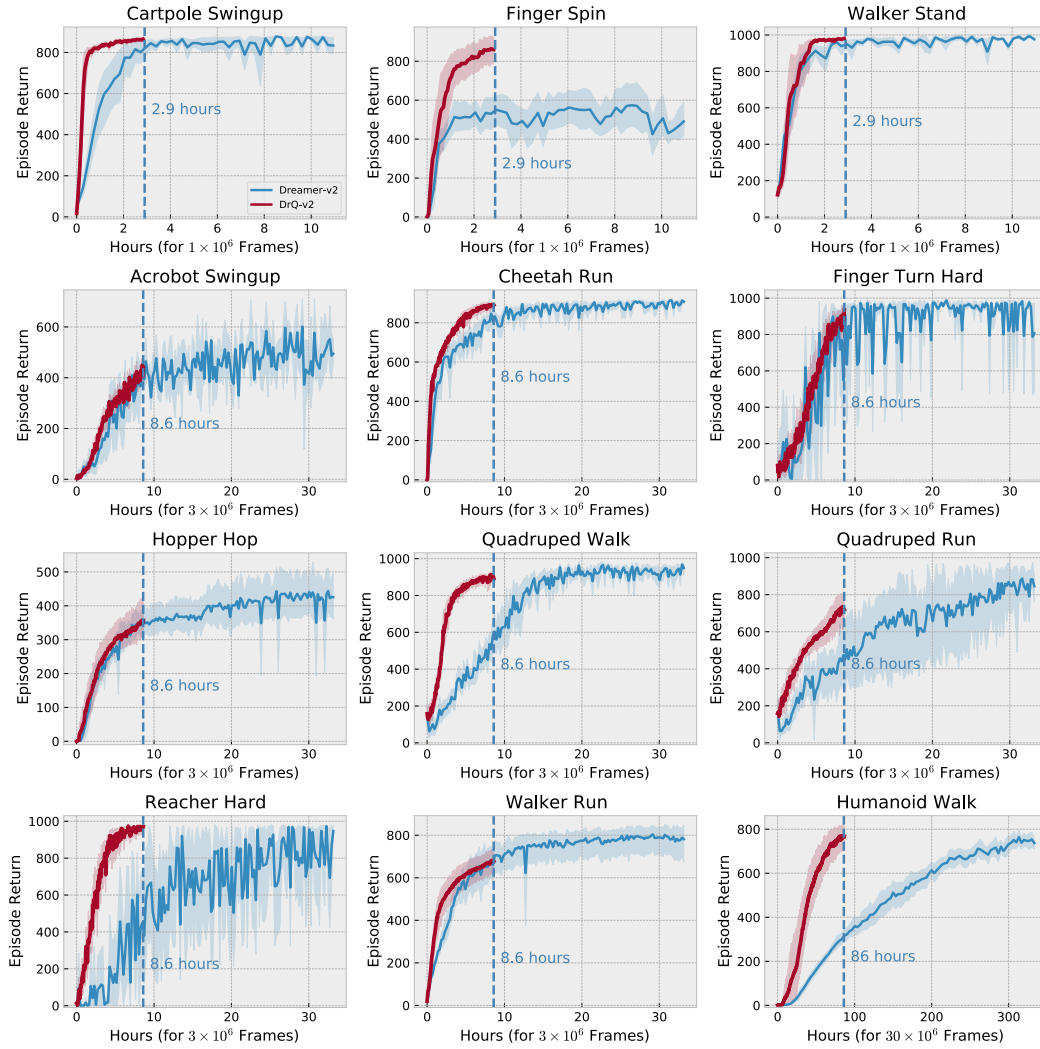

Figure 13: Model-based Dreamer-v2 performs more computations than model-free DrQ-v2. This allows DrQ-v2 to train faster in terms of wall-clock time and outperform Dreamer-v2 in this aspect.

## E HYPER-PARAMETERS

The full list of hyper-parameters is presented in Table 2. While we tried to keep the settings identical for each of the task, there are a few specific deviations for some tasks.

**Walker Stand/Walk/Run** For all three tasks we use mini-batch size of 512 and  $n$ -step return of 1.

**Cartpole Swingup Sparse** stddev. schedule is set to 1.0 to facilitate stronger exploration in the sparse reward setting.

**Quadruped Run** We set the replay buffer size to  $10^5$ .

**Humanoid Stand/Walk** We set learning rate to  $8 \times 10^{-5}$  and increase features dim. to 100.

Table 2: A default set of hyper-parameters used in our experiments.

| Parameter                                 | Setting                                                                                               |
|-------------------------------------------|-------------------------------------------------------------------------------------------------------|
| Replay buffer capacity                    | $10^6$                                                                                                |
| Action repeat                             | 2                                                                                                     |
| Seed frames                               | 4000                                                                                                  |
| Exploration steps                         | 2000                                                                                                  |
| $n$ -step returns                         | 3                                                                                                     |
| Mini-batch size                           | 256                                                                                                   |
| Discount $\gamma$                         | 0.99                                                                                                  |
| Optimizer                                 | Adam                                                                                                  |
| Learning rate                             | $10^{-4}$                                                                                             |
| Agent update frequency                    | 2                                                                                                     |
| Critic Q-function soft-update rate $\tau$ | 0.01                                                                                                  |
| Features dim.                             | 50                                                                                                    |
| Hidden dim.                               | 1024                                                                                                  |
| Exploration stddev. clip                  | 0.3                                                                                                   |
| Exploration stddev. schedule              | easy: linear(1.0, 0.1, 100000)<br>medium: linear(1.0, 0.1, 500000)<br>hard: linear(1.0, 0.1, 2000000) |
